# Supplementary material
Source: Springer Nature journal article supplement (https://www.springermedizin.de/resource/supplementary/13058_2010_9453_MOESM8_ESM.pdf/9702402)

**siCtrl****si14-3-3 $\zeta$** **+ 14-3-3 $\zeta$** **Tam** 0 5' 15' 30' 4h

0 5' 15' 30' 4h

0 5' 15' 30' 4h

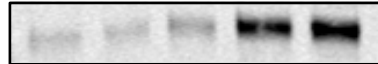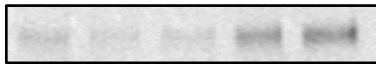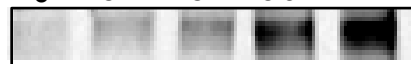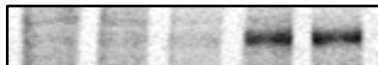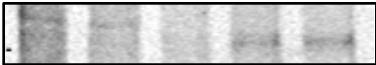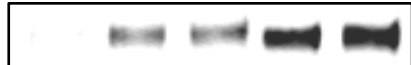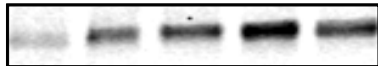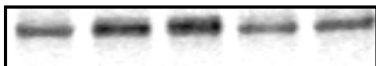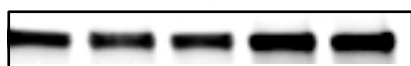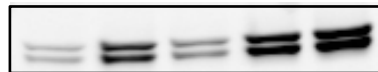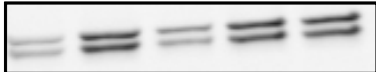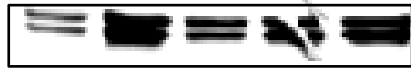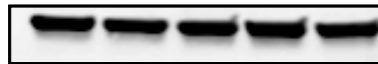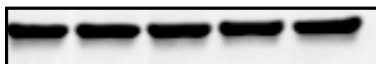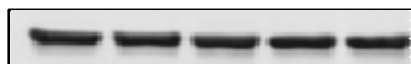**pHER2****pEGFR****pAKT****pMAPK** **$\beta$ -actin**

Supplement: MOESM8 [file 9702402]
